# Supplementary material
Source: PubMed Central journal article supplement (PMC11575932)
Supplement: NIHMS2032882-supplement-Supplement_2.pdf [file NIHMS2032882-supplement-Supplement_2.pdf]

## Supplementary Material

**Supplementary Table 1** - Standard Time-to-event Analysis Compared With Competing Risk Analysis.

**Supplementary Table 2** - Baseline Characteristics Of Patients Who Underwent A Peripheral Vascular Intervention (PVI) In The Chronic Limb-Threatening Ischemia (CLTI) And Non-CLTI Cohorts.

**Supplementary Table 3** - The Unadjusted And Adjusted 2-Year Risk Of Major Amputation In Patients Aged  $\geq 75$  Years Vs.  $< 75$  Year Derived From Standard Cox Proportional Hazard Regression Model And Compared With Competing Risk Fine-Gray Regression Model, In The Chronic Limb-Threatening Ischemia (CLTI) Cohort.

**Supplementary Table 4** - The Unadjusted And Adjusted 2-Year Risk Of Major Amputation In Patients Aged  $\geq 75$  Years Vs.  $< 75$  Year Derived From Standard Cox Proportional Hazard Regression Model And Compared With Competing Risk Fine-Gray Regression Model, In The Non-Chronic Limb-Threatening Ischemia (Non-CLTI) Cohort.

**Supplementary Table 5** - The 2-Year Cumulative Incidence Of Major Amputation And Death Without Major Amputation In Patients Aged  $< 75$  And  $\geq 75$  Years Using Standard Time-to-event (Kaplan-Meier) And Competing Risk Analysis (Alaen-Johansen); And Unadjusted And Adjusted 2-Year Major Amputation Risk In Patients Aged  $< 75$  Vs.  $\geq 75$  Years, Derived From Standard Time-to-event (Hazard Ratio From Cox Proportional Hazard) And Competing Risk (Sub-Hazard Ratio From Fine-Gray) Regression Models, In Both Chronic Limb-Threatening Ischemia (CLTI) And Non-CLTI Cohorts.

**Supplementary Table 1** - Standard Time-to-event Analysis Compared With Competing Risk Analysis.

|                                      | <b>Standard Time-to-event</b>                                                                                                                                                     | <b>Competing Risk</b>                                                                                                                                                                                                                            | <b>Comparison</b>                                          |
|--------------------------------------|-----------------------------------------------------------------------------------------------------------------------------------------------------------------------------------|--------------------------------------------------------------------------------------------------------------------------------------------------------------------------------------------------------------------------------------------------|------------------------------------------------------------|
|                                      | Ignoring the competing all-cause mortality risk in the estimation of major amputation.                                                                                            | Taking the competing all-cause mortality risk into account in the estimation of major amputation.                                                                                                                                                |                                                            |
| <b>Cumulative Incidence Function</b> |                                                                                                                                                                                   |                                                                                                                                                                                                                                                  |                                                            |
| Method                               | 1 minus Kaplan-Meier                                                                                                                                                              | Aalen-Johansen                                                                                                                                                                                                                                   |                                                            |
| Notations                            | CIF <sub>KM</sub>                                                                                                                                                                 | CIF <sub>AJ</sub>                                                                                                                                                                                                                                |                                                            |
| Estimates                            | Cumulative incidence of the occurrence of primary event at time <i>t</i> . Sum of the cumulative incidence of events exceeds the cumulative incidence of the composite of events. | Cumulative incidence of the occurrence of the primary event at time <i>t</i> and before the occurrence of another event (competing event). Sum of the cumulative incidence of events equals the cumulative incidence of the composite of events. | Relative Difference = $\frac{CIF_{KM}-CIF_{AJ}}{CIF_{AJ}}$ |
| <b>Regression Model</b>              |                                                                                                                                                                                   |                                                                                                                                                                                                                                                  |                                                            |
| Method                               | Cox Proportional Hazard                                                                                                                                                           | Fine-Gray                                                                                                                                                                                                                                        |                                                            |
| Notations                            | HR                                                                                                                                                                                | sHR                                                                                                                                                                                                                                              |                                                            |
| Estimates                            | Hazard Ratio:<br>Measure of the association of covariates with the primary event ignoring competing event.                                                                        | Sub-hazard Ratio:<br>Measure of the association of covariates with both events, primary and competing events.                                                                                                                                    | Relative Difference = $\frac{HR-sHR}{sHR}$                 |
| Prediction                           | Mean prediction of the major amputation risk                                                                                                                                      | Mean prediction of the cumulation incidence major amputation                                                                                                                                                                                     |                                                            |

*Abbreviations: CIF, Cumulative Incidence Function; KM, Kaplan-Meier; AJ, Aalen-Johansen; HR, Hazard Ratio; sHR, Sub-hazard Ratio.*

**Supplementary Table 2** - Baseline Characteristics Of Patients Who Underwent A Peripheral Vascular Intervention (PVI) In The Chronic Limb-Threatening Ischemia (CLTI) And Non-CLTI Cohorts.

|                                      | <b>CLTI<br/>(N=7,273)</b> | <b>Non-CLTI<br/>(N=5,095)</b> |
|--------------------------------------|---------------------------|-------------------------------|
| Age, years                           |                           |                               |
| Mean (SD)                            | 76.6 (7.6)                | 74.1 (6.3)                    |
| Median [Q1; Q3]                      | 76.0 [70.0; 83.0]         | 73.0 [69.0; 78.0]             |
| Female Sex                           | 3,000 (41.2)              | 1,934 (38.0)                  |
| Hispanic or Latino                   | 315 (4.3)                 | 106 (2.1)                     |
| Race                                 |                           |                               |
| White                                | 5,692 (78.3)              | 4,457 (87.5)                  |
| Black or African American            | 1,144 (15.7)              | 453 (8.9)                     |
| Other or Unknown                     | 437 (6.0)                 | 185 (3.6)                     |
| Primary insurer                      |                           |                               |
| Medicare/Medicaid                    | 7,001 (96.3)              | 4,883 (95.8)                  |
| Commercial/Other                     | 272 (3.7)                 | 212 (4.2)                     |
| Procedure urgency                    |                           |                               |
| Elective                             | 5,634 (77.5)              | 4,907 (96.3)                  |
| Urgent                               | 1,454 (20.0)              | 161 (3.2)                     |
| Emergent                             | 185 (2.5)                 | 27 (0.5)                      |
| Preoperative location living at home | 6,553 (90.1)              | 5,050 (99.1)                  |
| Functional status                    |                           |                               |
| Full                                 | 2,345 (32.7)              | 2,824 (56.4)                  |
| Light work                           | 1,809 (25.2)              | 1,315 (26.3)                  |
| Self-care                            | 1,724 (24.1)              | 779 (15.6)                    |
| Ambulation category                  |                           |                               |
| Independently                        | 3,497 (48.8)              | 4,367 (87.3)                  |
| With assistance                      | 2,724 (38.1)              | 588 (11.8)                    |
| BMI, kg.m <sup>-2</sup>              |                           |                               |
| Mean (SD)                            | 27.3 (6.1)                | 27.7 (5.4)                    |
| Median [Q1; Q3]                      | 26.6 [23.0; 30.8]         | 27.3 [24.1; 31.0]             |
| Cerebrovascular disease              | 1,440 (19.8)              | 689 (13.5)                    |
| Coronary artery disease              | 2,788 (38.3)              | 1,955 (38.4)                  |
| Congestive heart failure             | 2,327 (32.0)              | 777 (15.3)                    |
| Dysrhythmia                          | 2,439 (33.5)              | 944 (18.5)                    |
| Chronic lung disease                 | 2,023 (27.8)              | 1,495 (29.3)                  |
| Diabetes                             | 4,517 (62.1)              | 2,024 (39.7)                  |
| Stages of CKD                        |                           |                               |
| Stage 1: $\geq 90$                   | 1,527 (21.0)              | 1,219 (23.9)                  |
| Stage 2: [60-90]                     | 2,350 (32.3)              | 2,216 (43.5)                  |
| Stage 3: [30-60]                     | 2,055 (28.3)              | 1,456 (28.6)                  |
| Stage 4: [15-30]                     | 293 (4.0)                 | 72 (1.4)                      |
| Stage 5: $< 15$                      | 1,048 (14.4)              | 132 (2.6)                     |
| Hypertension                         | 6,696 (92.1)              | 4,635 (91.0)                  |
| Smoking status                       |                           |                               |
| Never                                | 2,334 (32.1)              | 721 (14.2)                    |

|                                      | <b>CLTI<br/>(N=7,273)</b> | <b>Non-CLTI<br/>(N=5,095)</b> |
|--------------------------------------|---------------------------|-------------------------------|
| Prior                                | 3,575 (49.2)              | 3,014 (59.2)                  |
| Current                              | 1,364 (18.8)              | 1,360 (26.7)                  |
| Preoperative ASA                     | 5,176 (71.2)              | 4,103 (80.5)                  |
| Preoperative Antiplatelet            | 2,891 (39.7)              | 2,447 (48.0)                  |
| Preoperative Statin                  | 5,461 (75.1)              | 4,205 (82.5)                  |
| Preoperative ACEi/ARB ± HTN          | 4,094 (56.3)              | 3,435 (67.4)                  |
| Preoperative GDMT                    | 2,726 (37.5)              | 2,655 (52.1)                  |
| Discharge GDMT                       | 3,145 (44.0)              | 2,903 (57.1)                  |
| CABG                                 | 1,756 (24.1)              | 1,257 (24.7)                  |
| PCI                                  | 1,790 (24.6)              | 1,499 (29.4)                  |
| Carotid disease                      | 660 (9.1)                 | 717 (14.1)                    |
| No Prior major amputation            | 6,482 (89.1)              | 5,026 (98.6)                  |
| No Prior minor amputation            | 6,314 (86.8)              | 5,014 (98.4)                  |
| Prior inflow treatment PVI           | 861 (11.8)                | 1,043 (20.5)                  |
| Prior inflow treatment bypass        | 199 (2.7)                 | 195 (3.8)                     |
| Prior infrainguinal PVI              | 2,283 (31.4)              | 1,724 (33.9)                  |
| Prior infrainguinal bypass           | 756 (10.4)                | 427 (8.4)                     |
| Prior femoral endarterectomy         | 419 (5.8)                 | 345 (6.8)                     |
| CLTI laterality                      |                           |                               |
| Unilateral                           | 6,148 (84.5)              |                               |
| Bilateral                            | 1,125 (15.5)              |                               |
| Number of access sites               |                           |                               |
| 1                                    | 6,401 (88.1)              | 4,055 (79.7)                  |
| 2                                    | 864 (11.9)                | 1,036 (20.3)                  |
| Number of artery treated (Mean (SD)) | 1.8 (0.9)                 | 1.6 (0.8)                     |
| Plain balloon                        | 5,831 (80.2)              | 3,461 (68.0)                  |
| Atherectomy                          | 1,501 (20.6)              | 1,200 (23.6)                  |
| Stent                                | 2,758 (37.9)              | 2,715 (53.3)                  |

*All values are presented as n (%), unless otherwise specified.*

*Abbreviations: CLTI, Chronic Limb-threatening Ischemia; SD, Standard Deviation; Q1;Q3, Interquartile Range; BMI, Body Mass Index; CKD, Chronic Kidney Disease; ASA, Aspirin; HTN, Hypertension; ACEi, Angiotensin-Converting Enzyme Inhibitor; ARB, Angiotensin Receptor Blocker; GDMT, Guideline-Directed Medical Therapy; CABG, Coronary Artery Bypass Grafting; PCI, Percutaneous Intervention; PVI, Peripheral Vascular Intervention.*

**Supplementary Table 3** - The Unadjusted And Adjusted 2-Year Risk Of Major Amputation In Patients Aged  $\geq 75$  Years Vs.  $< 75$  Year Derived From Standard Cox Proportional Hazard Regression Model And Compared With Competing Risk Fine-Gray Regression Model, In The Chronic Limb-Threatening Ischemia (CLTI) Cohort.

|                                           | Standard Time-to-event              |           | Competing Risk         |           | Relative Difference (%)* |
|-------------------------------------------|-------------------------------------|-----------|------------------------|-----------|--------------------------|
|                                           | Cox Proportional Hazard HR (95% CI) | P-Value   | Fine-Gray sHR (95% CI) | P-Value   |                          |
| <b>Unadjusted</b>                         |                                     |           |                        |           |                          |
| Aged $\geq 75$ vs. $< 75$ years           | 0.71 (0.62-0.81)                    | $< 0.001$ | 0.66 (0.58-0.75)       | $< 0.001$ | 7.1                      |
| <b>Adjusted</b>                           |                                     |           |                        |           |                          |
| Aged $\geq 75$ vs. $< 75$ years           | 0.85 (0.74-0.97)                    | 0.015     | 0.79 (0.69-0.91)       | 0.001     | 7.0                      |
| Female Sex                                | 0.68 (0.58-0.78)                    | $< 0.001$ | 0.67 (0.57-0.77)       | $< 0.001$ | 1.7                      |
| Race                                      |                                     |           |                        |           |                          |
| Black/African American                    | 1.57 (1.33-1.85)                    | $< 0.001$ | 1.57 (1.33-1.85)       | $< 0.001$ | -0.1                     |
| Other or Unknown                          | 1.33 (1.02-1.73)                    | 0.033     | 1.32 (1.01-1.72)       | 0.040     | 0.7                      |
| Ethnicity (Hispanic)                      | 1.07 (0.79-1.45)                    | 0.659     | 1.08 (0.79-1.47)       | 0.627     | -0.8                     |
| Region ID                                 | 1.00 (0.98-1.01)                    | 0.409     | 1.00 (0.98-1.01)       | 0.399     | 0.0                      |
| Commercial/Other                          | 0.68 (0.47-1.00)                    | 0.049     | 0.67 (0.46-0.97)       | 0.034     | 2.8                      |
| Living at Home                            | 0.72 (0.59-0.87)                    | 0.001     | 0.80 (0.65-0.97)       | 0.027     | -9.9                     |
| Smoking (vs. Current)                     |                                     |           |                        |           |                          |
| Never                                     | 1.33 (1.08-1.64)                    | 0.006     | 1.34 (1.09-1.64)       | 0.006     | -0.28                    |
| Prior                                     | 1.16 (0.95-1.41)                    | 0.135     | 1.15 (0.95-1.39)       | 0.158     | 0.90                     |
| Preoperative GDMT                         | 0.94 (0.82-1.08)                    | 0.373     | 0.98 (0.86-1.13)       | 0.804     | -4.3                     |
| Hypertension                              | 0.86 (0.67-1.10)                    | 0.232     | 0.89 (0.69-1.14)       | 0.350     | -3.2                     |
| Congestive Heart Failure                  | 1.13 (0.99-1.30)                    | 0.078     | 1.04 (0.90-1.20)       | 0.577     | 8.9                      |
| Coronary Artery Disease                   | 1.19 (1.02-1.38)                    | 0.028     | 1.17 (1.01-1.37)       | 0.038     | 1.1                      |
| CABG                                      | 1.03 (0.88-1.21)                    | 0.690     | 1.03 (0.88-1.20)       | 0.727     | 0.4                      |
| PCI                                       | 1.01 (0.87-1.18)                    | 0.873     | 0.99 (0.84-1.15)       | 0.861     | 2.7                      |
| Diabetes                                  | 1.59 (1.35-1.88)                    | $< 0.001$ | 1.58 (1.34-1.87)       | $< 0.001$ | 0.5                      |
| Stages of CKD 3 to 5 vs. 1/2              | 1.29 (1.12-1.47)                    | $< 0.001$ | 1.18 (1.03-1.36)       | 0.016     | 8.6                      |
| Cerebrovascular Disease                   | 1.04 (0.89-1.22)                    | 0.618     | 1.02 (0.87-1.19)       | 0.814     | 2.1                      |
| Endarterectomy/Carotid stenting           | 1.22 (0.98-1.51)                    | 0.069     | 1.23 (0.99-1.53)       | 0.056     | -0.9                     |
| Prior amputation (vs. No)                 |                                     |           |                        |           |                          |
| Major                                     | 2.11 (1.77-2.50)                    | $< 0.001$ | 2.09 (1.76-2.49)       | $< 0.001$ | 0.7                      |
| Minor                                     | 1.63 (1.37-1.94)                    | $< 0.001$ | 1.65 (1.38-1.97)       | $< 0.001$ | -1.3                     |
| History of bypass, endarterectomy, or PVI | 1.27 (1.11-1.46)                    | $< 0.001$ | 1.30 (1.14-1.49)       | $< 0.001$ | -2.0                     |
| Urgency                                   |                                     |           |                        |           |                          |
| Urgent                                    | 1.25 (1.08-1.46)                    | 0.003     | 1.18 (1.01-1.37)       | 0.040     | 6.7                      |
| Emergent                                  | 1.24 (0.84-1.85)                    | 0.284     | 1.07 (0.71-1.61)       | 0.737     | 15.8                     |

Abbreviations: CLTI, Chronic Limb-threatening Ischemia; GDMT, Guideline-Directed Medical Therapy; CABG, Coronary Artery Bypass Grafting; PCI, Percutaneous Intervention; CKD, Chronic Kidney Disease; PVI, Peripheral Vascular Intervention.

\*All relative differences were calculated before rounding the estimators

**Supplementary Table 4** - The Unadjusted And Adjusted 2-Year Risk Of Major Amputation In Patients Aged  $\geq 75$  Years Vs.  $< 75$  Year Derived From Standard Cox Proportional Hazard Regression Model And Compared With Competing Risk Fine-Gray Regression Model, In The Non-Chronic Limb-Threatening Ischemia (Non-CLTI) Cohort.

|                                           | Standard Time-to-event              |         | Competing Risk         |         | Relative Difference (%)* |
|-------------------------------------------|-------------------------------------|---------|------------------------|---------|--------------------------|
|                                           | Cox Proportional Hazard HR (95% CI) | P-Value | Fine-Gray sHR (95% CI) | P-Value |                          |
| <b>Unadjusted</b>                         |                                     |         |                        |         |                          |
| Aged $\geq 75$ vs. $< 75$ years           | 1.14 (0.70-1.85)                    | 0.607   | 1.11 (0.68-1.81)       | 0.676   | 2.4                      |
| <b>Adjusted</b>                           |                                     |         |                        |         |                          |
| Aged $\geq 75$ vs. $< 75$ years           | 0.90 (0.53-1.51)                    | 0.686   | 0.86 (0.51-1.43)       | 0.551   | 5.1                      |
| Female Sex                                | 0.90 (0.51-1.57)                    | 0.708   | 0.88 (0.49-1.59)       | 0.674   | 2.1                      |
| Race                                      |                                     |         |                        |         |                          |
| Black/African American                    | 1.70 (0.86-3.36)                    | 0.129   | 1.62 (0.76-3.47)       | 0.215   | 4.8                      |
| Other or Unknown                          | 1.05 (0.28-3.87)                    | 0.947   | 1.05 (0.27-4.06)       | 0.948   | -0.1                     |
| Ethnicity (Hispanic)                      | 2.65 (0.84-8.37)                    | 0.097   | 2.80 (0.83-9.50)       | 0.098   | -5.5                     |
| Region ID                                 |                                     |         |                        |         |                          |
| Commercial/Other                          | 0.98 (0.94-1.02)                    | 0.312   | 0.98 (0.94-1.02)       | 0.318   | -0.2                     |
| Living at Home                            | 1.79 (0.64-5.00)                    | 0.270   | 1.80 (0.65-4.98)       | 0.256   | -0.9                     |
| Smoking (vs. Current)                     | 0.18 (0.07-0.48)                    | 0.001   | 0.23 (0.07-0.75)       | 0.015   | -20.3                    |
| Never                                     | 2.04 (0.85-4.91)                    | 0.110   | 2.08 (0.84-5.11)       | 0.112   | -1.6                     |
| Prior                                     | 1.72 (0.81-3.62)                    | 0.156   | 1.77 (0.78-4.01)       | 0.172   | -3.0                     |
| Preoperative GDMT                         | 0.71 (0.42-1.19)                    | 0.193   | 0.72 (0.43-1.19)       | 0.199   | -1.0                     |
| Hypertension                              | 0.68 (0.26-1.78)                    | 0.436   | 0.70 (0.26-1.86)       | 0.474   | -2.3                     |
| Congestive Heart Failure                  | 1.50 (0.85-2.66)                    | 0.163   | 1.44 (0.81-2.59)       | 0.217   | 3.9                      |
| Coronary Artery Disease                   | 1.12 (0.62-2.02)                    | 0.715   | 1.17 (0.61-2.23)       | 0.630   | -4.7                     |
| CABG                                      | 1.19 (0.65-2.18)                    | 0.577   | 1.15 (0.60-2.19)       | 0.670   | 3.3                      |
| PCI                                       | 0.61 (0.31-1.17)                    | 0.137   | 0.56 (0.29-1.08)       | 0.086   | 7.5                      |
| Diabetes                                  | 1.60 (0.94-2.74)                    | 0.085   | 1.54 (0.89-2.65)       | 0.120   | 4.1                      |
| Stages of CKD 3 to 5 vs. 1/2              | 2.05 (1.21-3.47)                    | 0.008   | 1.96 (1.16-3.32)       | 0.012   | 4.4                      |
| Cerebrovascular Disease                   | 1.48 (0.80-2.76)                    | 0.214   | 1.47 (0.78-2.78)       | 0.231   | 0.6                      |
| Endarterectomy/Carotid stenting           | 0.67 (0.30-1.52)                    | 0.341   | 0.70 (0.30-1.61)       | 0.397   | -3.4                     |
| Prior amputation (vs. No)                 |                                     |         |                        |         |                          |
| Major                                     | 7.08 (3.41-14.73)                   | <0.001  | 7.22 (3.39-15.41)      | <0.001  | -2.0                     |
| Minor                                     | 2.05 (0.71-5.95)                    | 0.186   | 1.93 (0.57-6.54)       | 0.291   | 6.3                      |
| History of bypass, endarterectomy, or PVI | 1.08 (0.64-1.82)                    | 0.780   | 1.08 (0.63-1.84)       | 0.782   | -0.1                     |
| Urgency                                   |                                     |         |                        |         |                          |
| Urgent                                    | 4.44 (2.12-9.26)                    | <0.001  | 3.92 (1.73-8.91)       | <0.001  | 13.0                     |
| Emergent                                  | 1.42 (0.18-11.28)                   | 0.742   | 1.46 (0.14-15.2)       | 0.752   | -2.9                     |

Abbreviations: CLTI, Chronic Limb-threatening Ischemia; GDMT, Guideline-Directed Medical Therapy; CABG, Coronary Artery Bypass Grafting; PCI, Percutaneous Intervention; CKD, Chronic Kidney Disease; PVI, Peripheral Vascular Intervention.

\*All relative differences were calculated before rounding the estimators

**Supplementary Table 5** - The 2-Year Cumulative Incidence Of Major Amputation And Death Without Major Amputation In Patients Aged <75 And ≥75 Years Using Standard Time-to-event (Kaplan-Meier) And Competing Risk Analysis (Aalen-Johansen); And Unadjusted And Adjusted 2-Year Major Amputation Risk In Patients Aged <75 Vs. ≥75 Years, Derived From Standard Time-to-event (Hazard Ratio From Cox Proportional Hazard) And Competing Risk (Sub-Hazard Ratio From Fine-Gray) Regression Models, In Both Chronic Limb-Threatening Ischemia (CLTI) And Non-CLTI Cohorts.

|                                                                           | Standard Time-to-event                               | Competing Risk                             | Relative Difference (%)* |
|---------------------------------------------------------------------------|------------------------------------------------------|--------------------------------------------|--------------------------|
| <b>CLTI</b>                                                               |                                                      |                                            |                          |
| <b>2-Year Cumulative Incidence Function (CIF)</b>                         | <b>Kaplan-Meier % (95% CI)</b>                       | <b>Aalen-Johansen % (95% CI)</b>           |                          |
| Of Major Amputation                                                       |                                                      |                                            |                          |
| In <75 years old                                                          | 19.1 (17.6-20.7)                                     | 16.8 (15.5-18.2)                           | 13.7                     |
| In ≥75 years old                                                          | 13.5 (12.3-14.8)                                     | 11.2 (10.2-12.2)                           | 20.5                     |
| Of Death Without Major Amputation                                         |                                                      |                                            |                          |
| In <75 years old                                                          | 32.7 (30.8-34.8)                                     | 28.7 (27.0-30.5)                           | 13.9                     |
| In ≥75 years old                                                          | 47.7 (45.9-49.5)                                     | 43.5 (41.9-45.2)                           | 9.7                      |
| <b>2-Year Risk Major Amputation In Patients Aged ≥75 vs. &lt;75 Years</b> | <b>Cox Proportional Hazard Hazard Ratio (95% CI)</b> | <b>Fine-Gray Sub-Hazard Ratio (95% CI)</b> |                          |
| Unadjusted                                                                | 0.71 (0.62-0.8)                                      | 0.66 (0.58-0.75)                           | 7.0                      |
| Adjusted                                                                  | 0.85 (0.74-0.97)                                     | 0.79 (0.69-0.91)                           | 7.1                      |
| <b>Non-CLTI</b>                                                           |                                                      |                                            |                          |
| <b>2-Year Cumulative Incidence Function (CIF)</b>                         | <b>Kaplan-Meier % (95% CI)</b>                       | <b>Aalen-Johansen % (95% CI)</b>           |                          |
| Of Major Amputation                                                       |                                                      |                                            |                          |
| In <75 years old                                                          | 1.4 (1.0-2.0)                                        | 1.4 (1.0-1.9)                              | 0.0                      |
| In ≥75 years old                                                          | 1.5 (1.1-2.2)                                        | 1.4 (1.0-2.0)                              | 7.1                      |
| Of Death Without Major Amputation                                         |                                                      |                                            |                          |
| In <75 years old                                                          | 8.6 (7.6-9.8)                                        | 9.6 (8.4-10.9)                             | -10.4                    |
| In ≥75 years old                                                          | 15.6 (14.0-17.3)                                     | 17.1 (15.3-18.9)                           | -8.8                     |
| <b>2-Year Risk Major Amputation In Patients Aged ≥75 vs. &lt;75 Years</b> | <b>Cox Proportional Hazard Hazard Ratio (95% CI)</b> | <b>Fine-Gray Sub-Hazard Ratio (95% CI)</b> |                          |
| Unadjusted                                                                | 1.14 (0.70-1.85)                                     | 1.11 (0.68-1.81)                           | 2.4                      |
| Adjusted                                                                  | 0.90 (0.53-1.51)                                     | 0.86 (0.51-1.43)                           | 5.1                      |

Abbreviations: CLTI, Chronic Limb-threatening Ischemia; CIF, Cumulative Incidence Function.

\*All relative differences were calculated before rounding the estimators
